# Supplementary material for: Enantiomeric Resolution and Docking Studies of Chiral Xanthonic Derivatives on Chirobiotic Columns
Source: PubMed Central journal article supplement (PMC6017832; doi:10.3390/molecules23010142), 2018-01-11
Supplement: molecules-23-00142-s001.pdf [file molecules-23-00142-s001.pdf]

Supplementary Material:

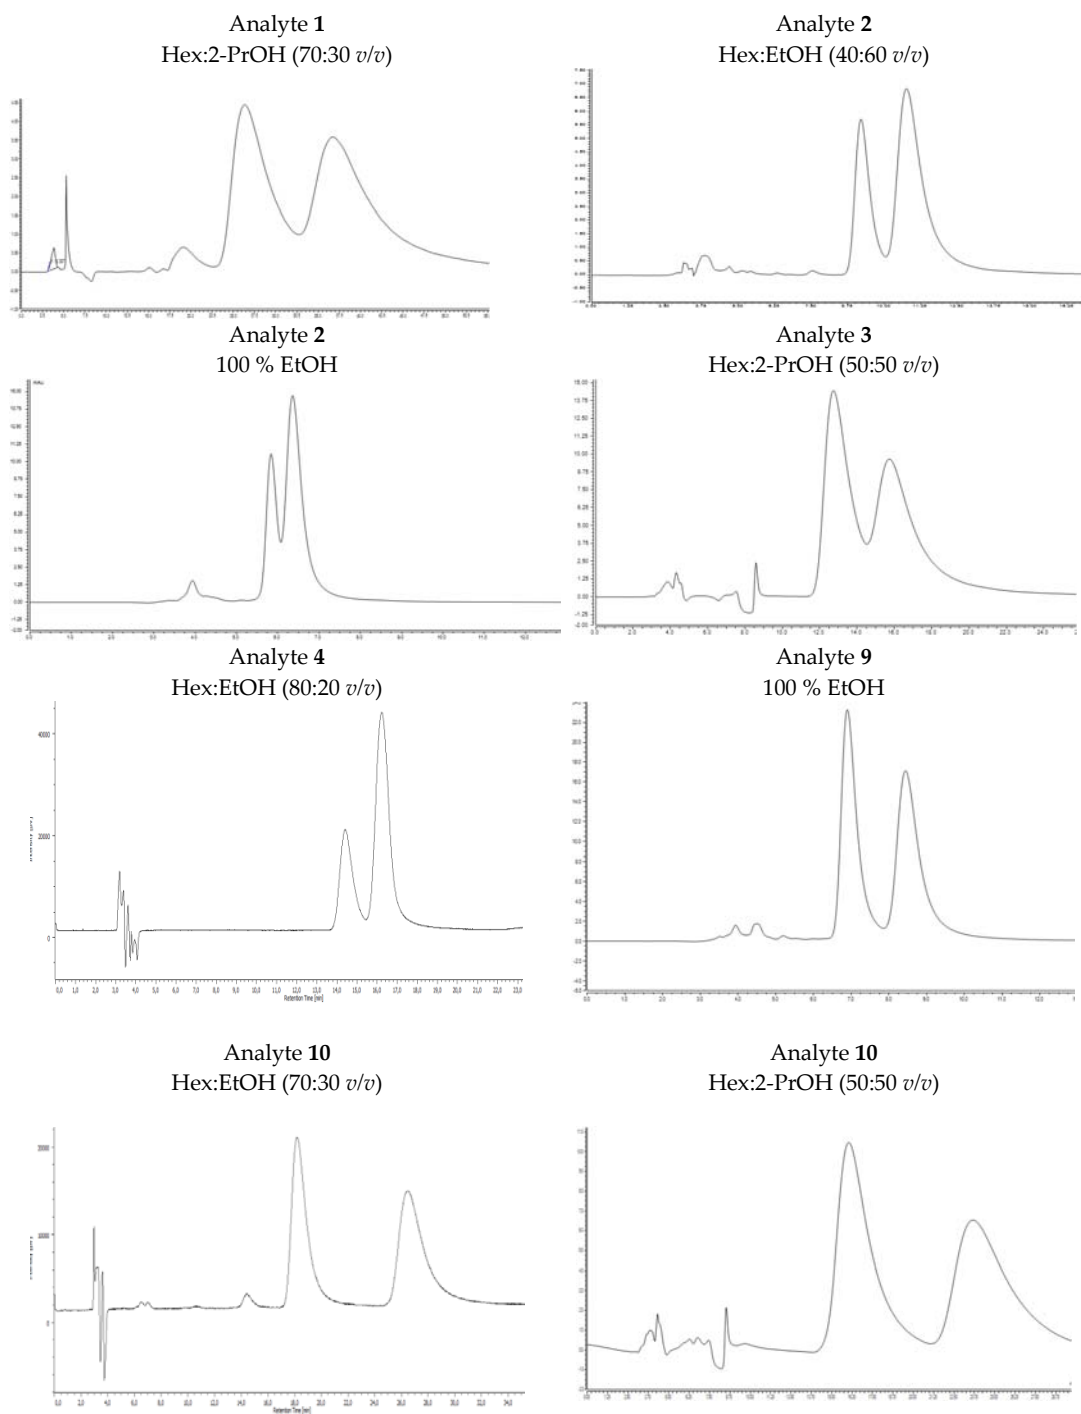

**Figure 1:** Chromatograms for the enantioseparation of analytes 1-4, 9 and 10 on Chirobiotic T column using different mobile phases. Chromatographic conditions: Flow rate: 0.5 mL/min, UV detection at 254 nm.

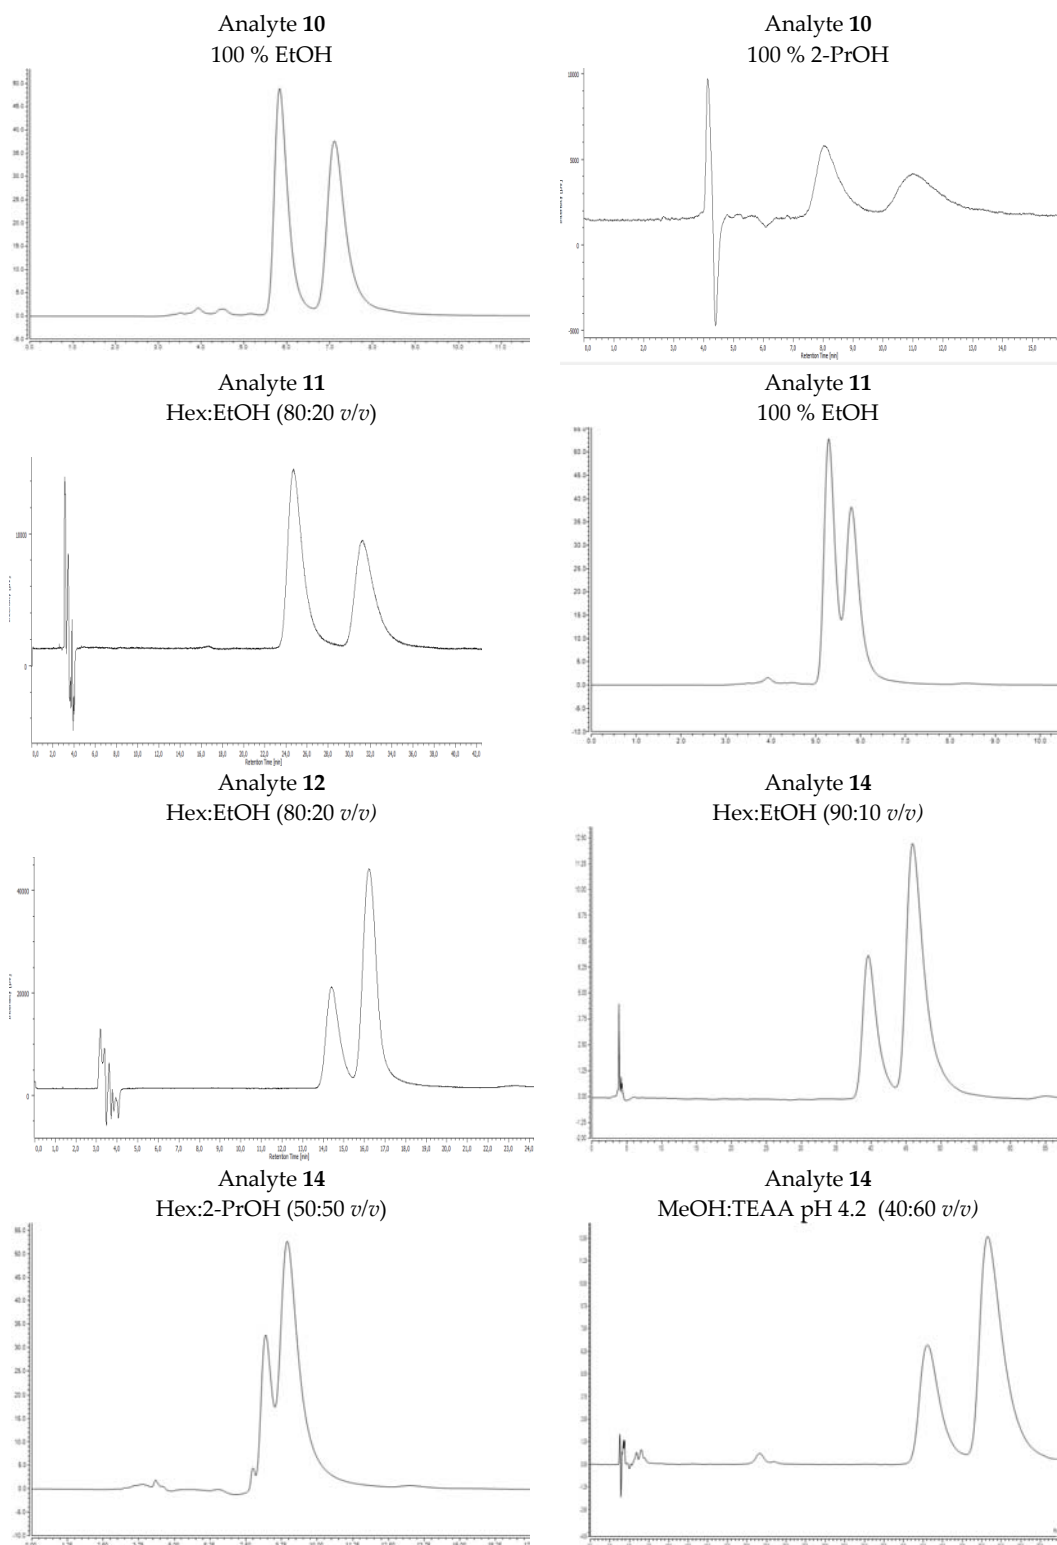

**Figure 2:** Chromatograms for the enantioseparation of analytes 10-12 and 14 on Chirobiotic T column using different mobile phases. Chromatographic conditions: Flow rate: 0.5 mL/min, UV detection at 254 nm.

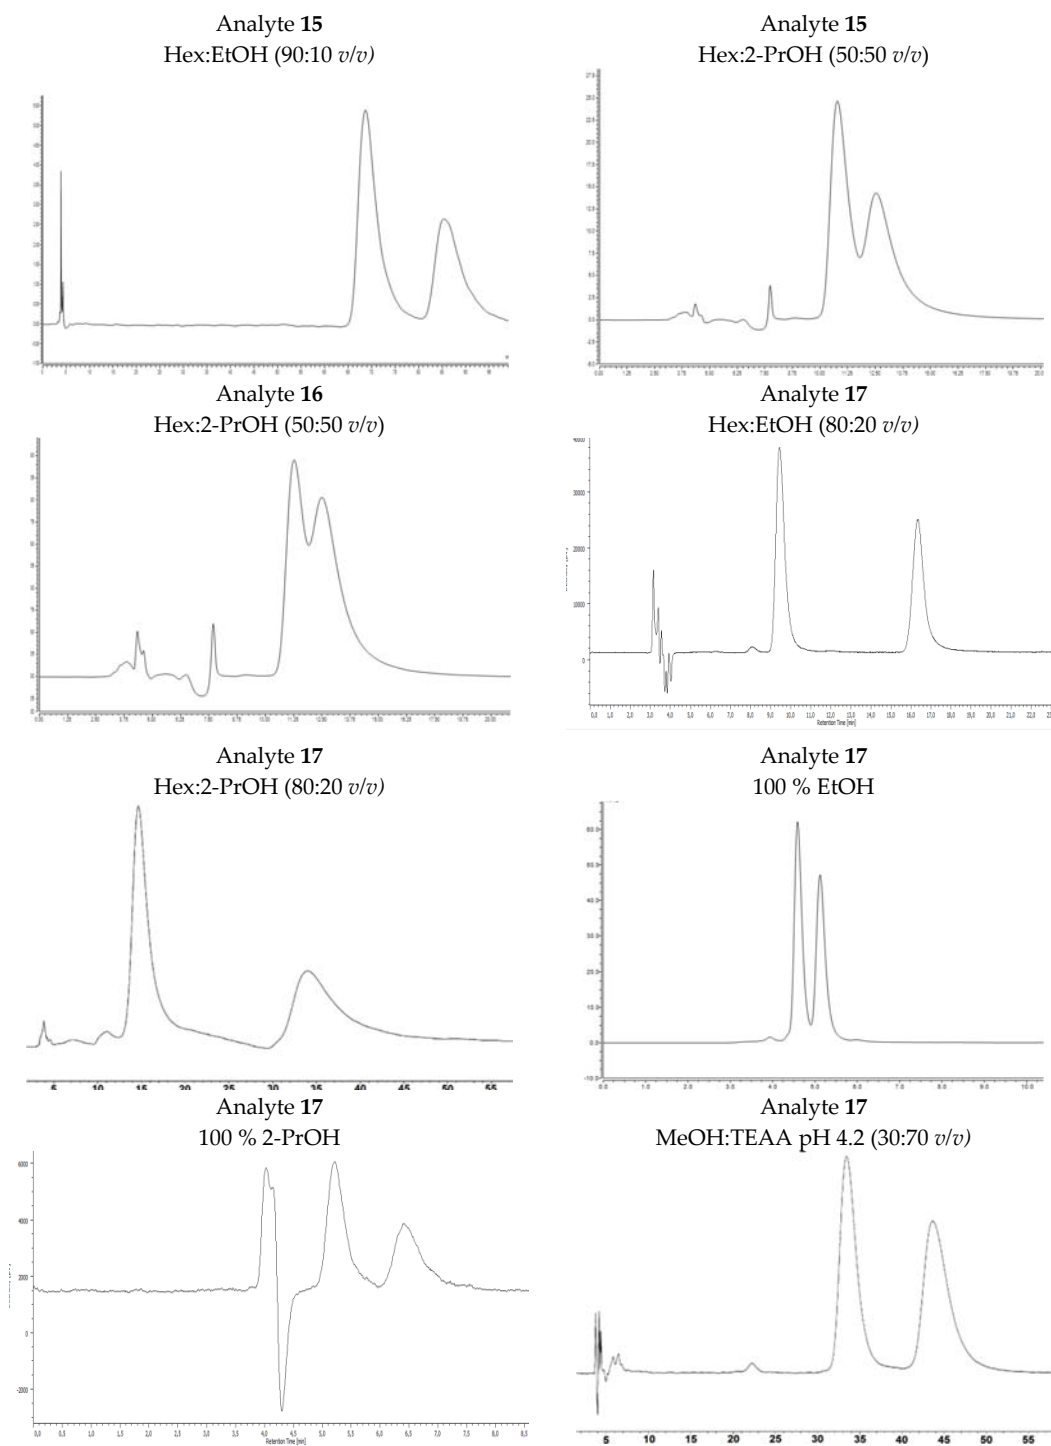

**Figure 3:** Chromatograms for the enantioseparation of analytes 15-17 on Chirobiotic T column using different mobile phases. Chromatographic conditions: Flow rate: 0.5 mL/min, UV detection at 254 nm.

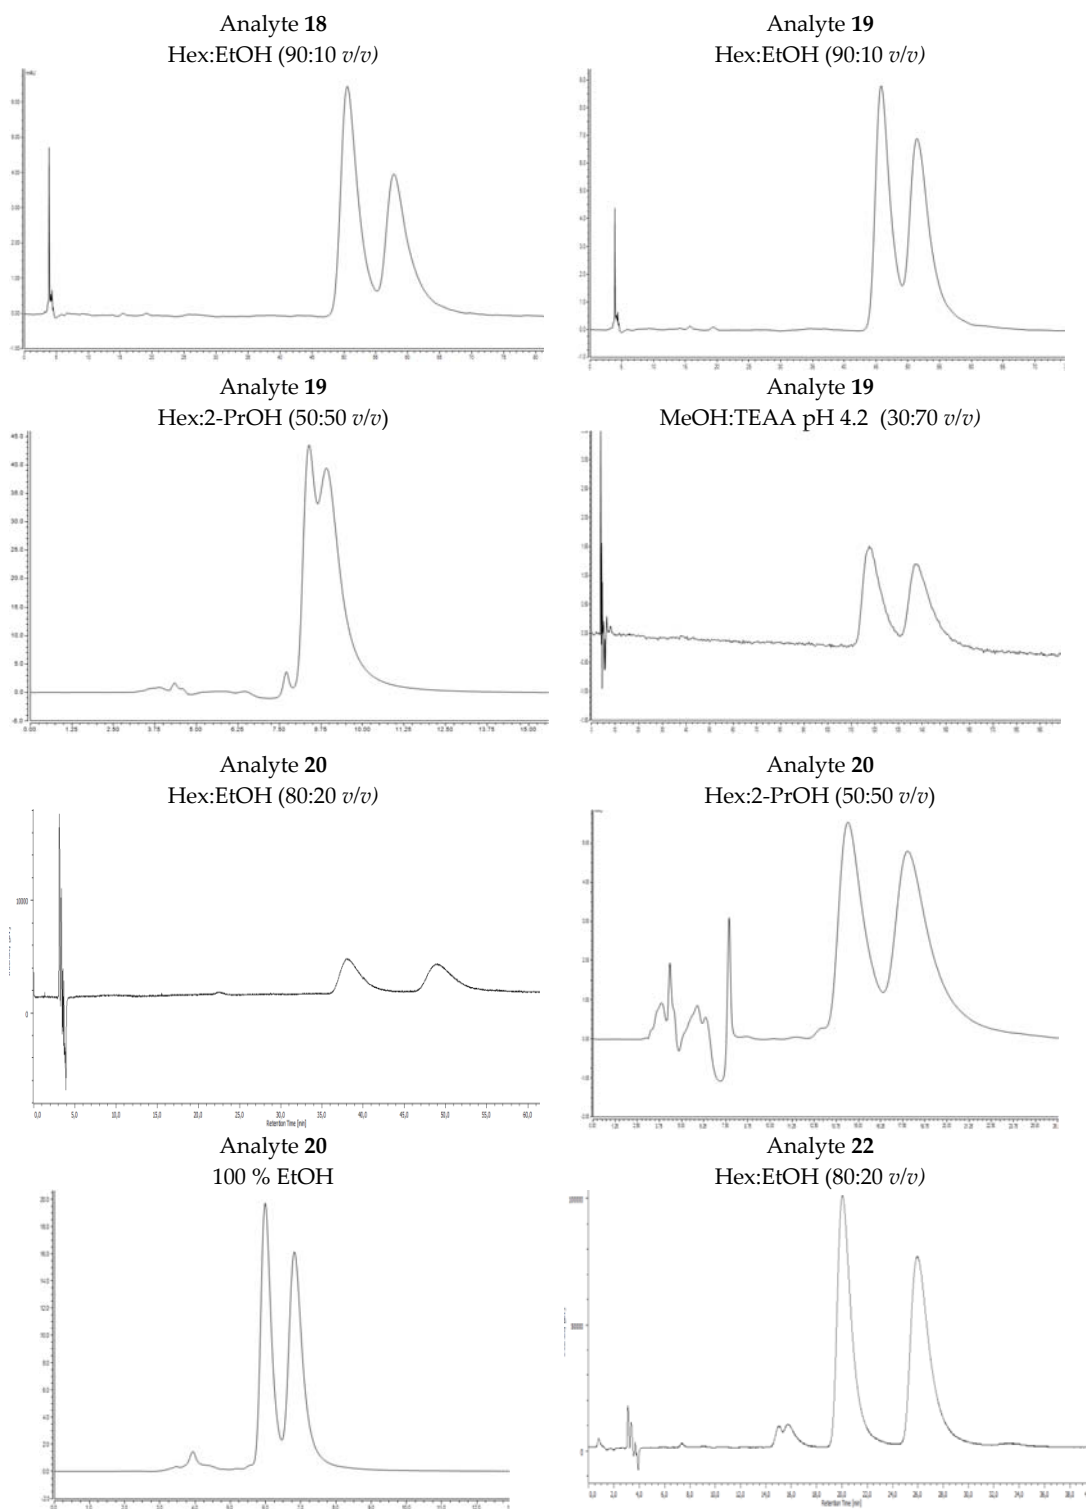

**Figure 4:** Chromatograms for the enantioseparation of analytes 18-20 and 22 on Chirobiotic T column using different mobile phases. Chromatographic conditions: Flow rate: 0.5 mL/min, UV detection at 254 nm.

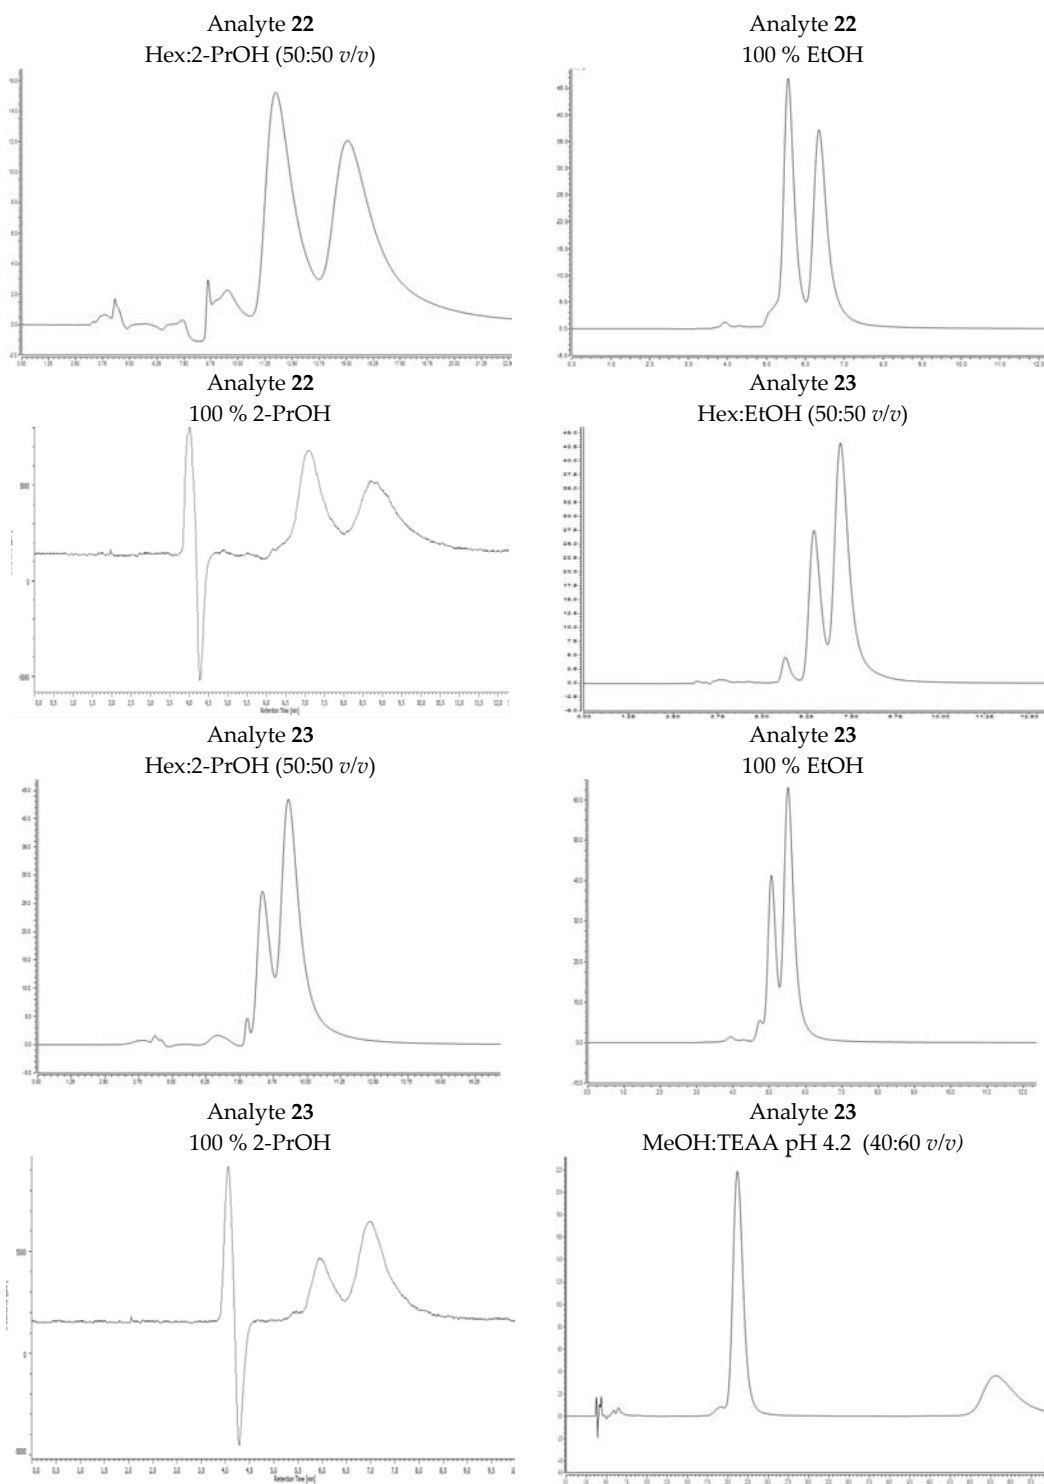

**Figure 5:** Chromatograms for the enantioseparation of analytes 22 and 23 on Chirobiotic T column using different mobile phases. Chromatographic conditions: Flow rate: 0.5 mL/min, UV detection at 254 nm.

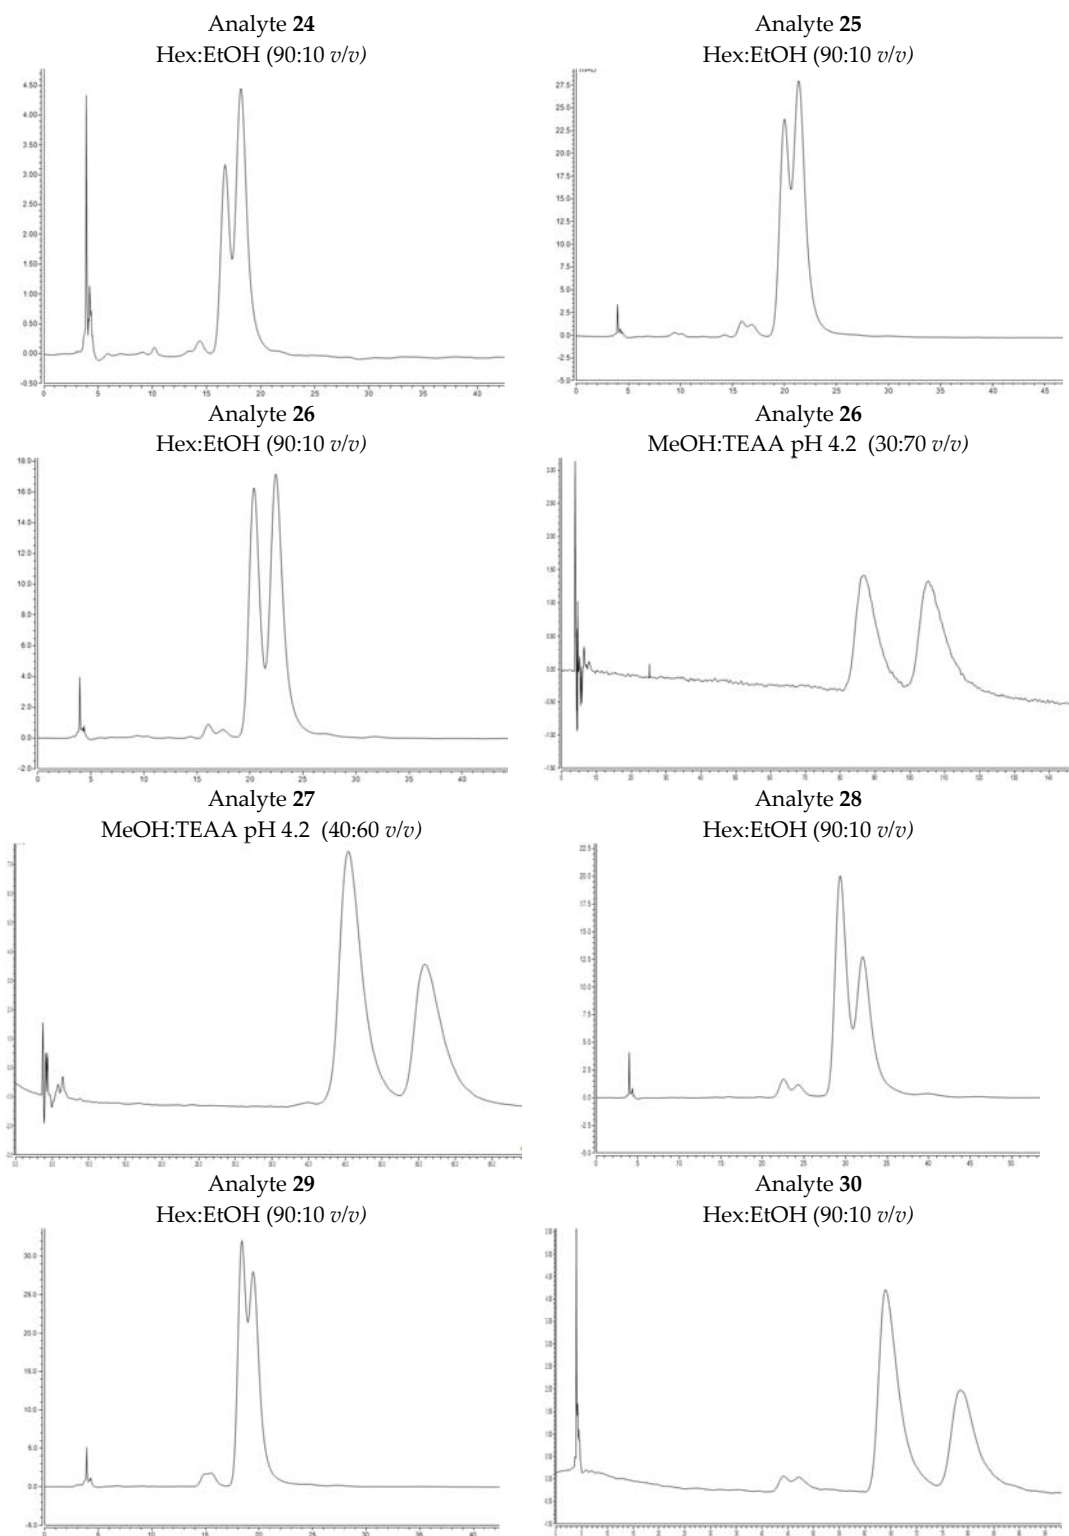

**Figure 6:** Chromatograms for the enantioseparation of analytes 24-30 on Chirobiotic T column using different mobile phases. Chromatographic conditions: Flow rate: 0.5 mL/min, UV detection at 254 nm.

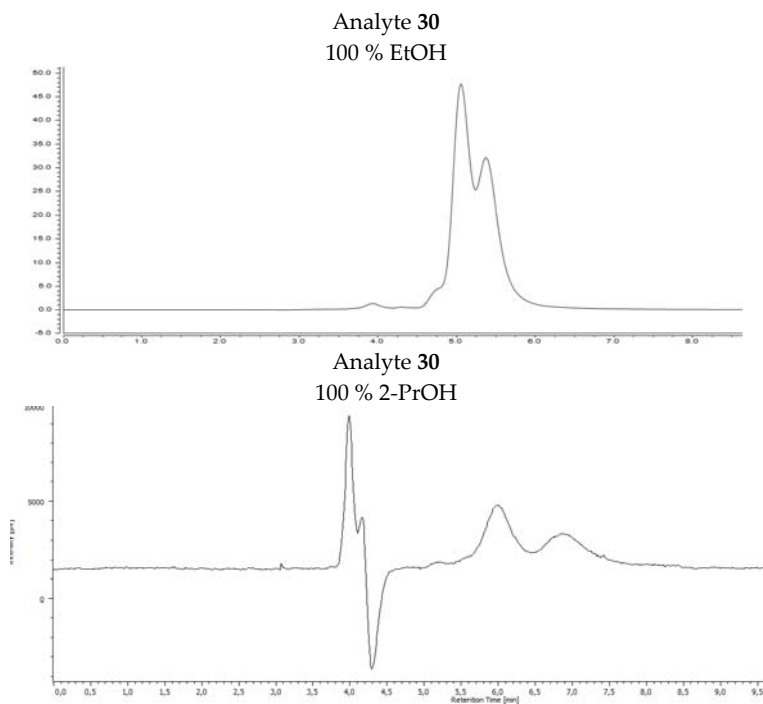

**Figure 7:** Chromatograms for the enantioseparation of analytes **30** on Chirobiotic T column using different mobile phases. Chromatographic conditions: Flow rate: 0.5 mL/min, UV detection at 254 nm.

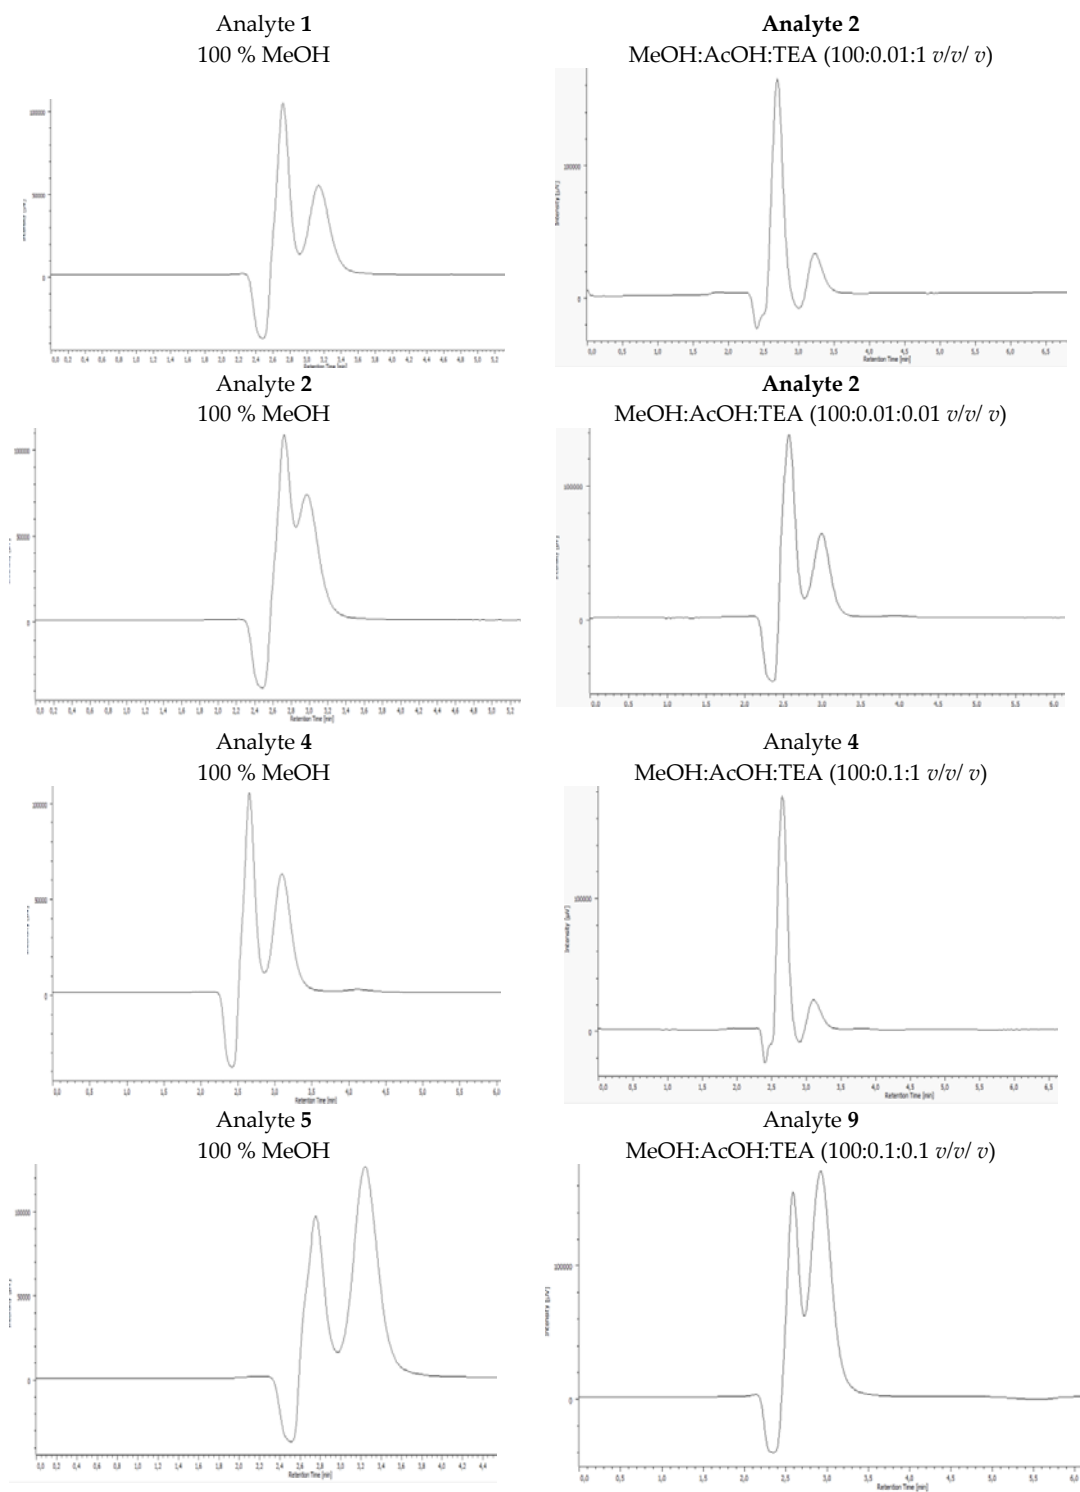

**Figure 8:** Chromatograms for the enantioseparation of analytes **1,2,4,5** and **9** on Chirobiotic R column using different mobile phases. Chromatographic conditions: Flow rate: 0.2 mL/min, UV detection at 254 nm.



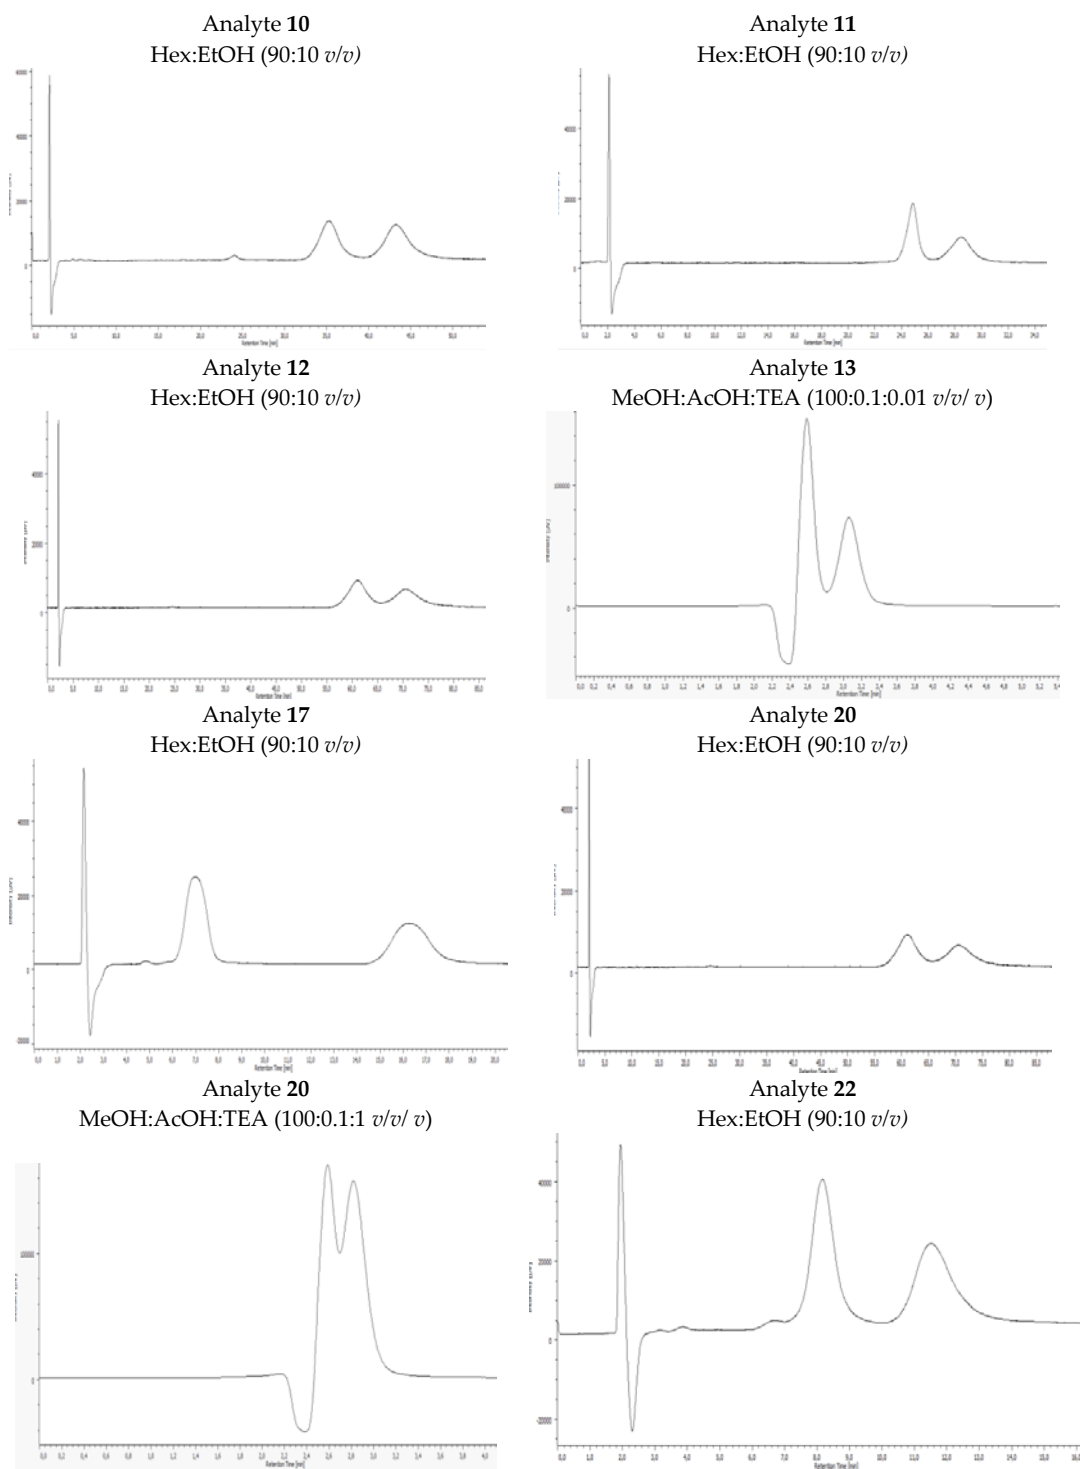

**SFigure 9:** Chromatograms for the enantioseparation of analytes 10-13, 17, 20 and 22 on Chirobiotic R column using different mobile phases. Chromatographic conditions: Flow rate: 0.2 mL/min, UV detection at 254 nm.

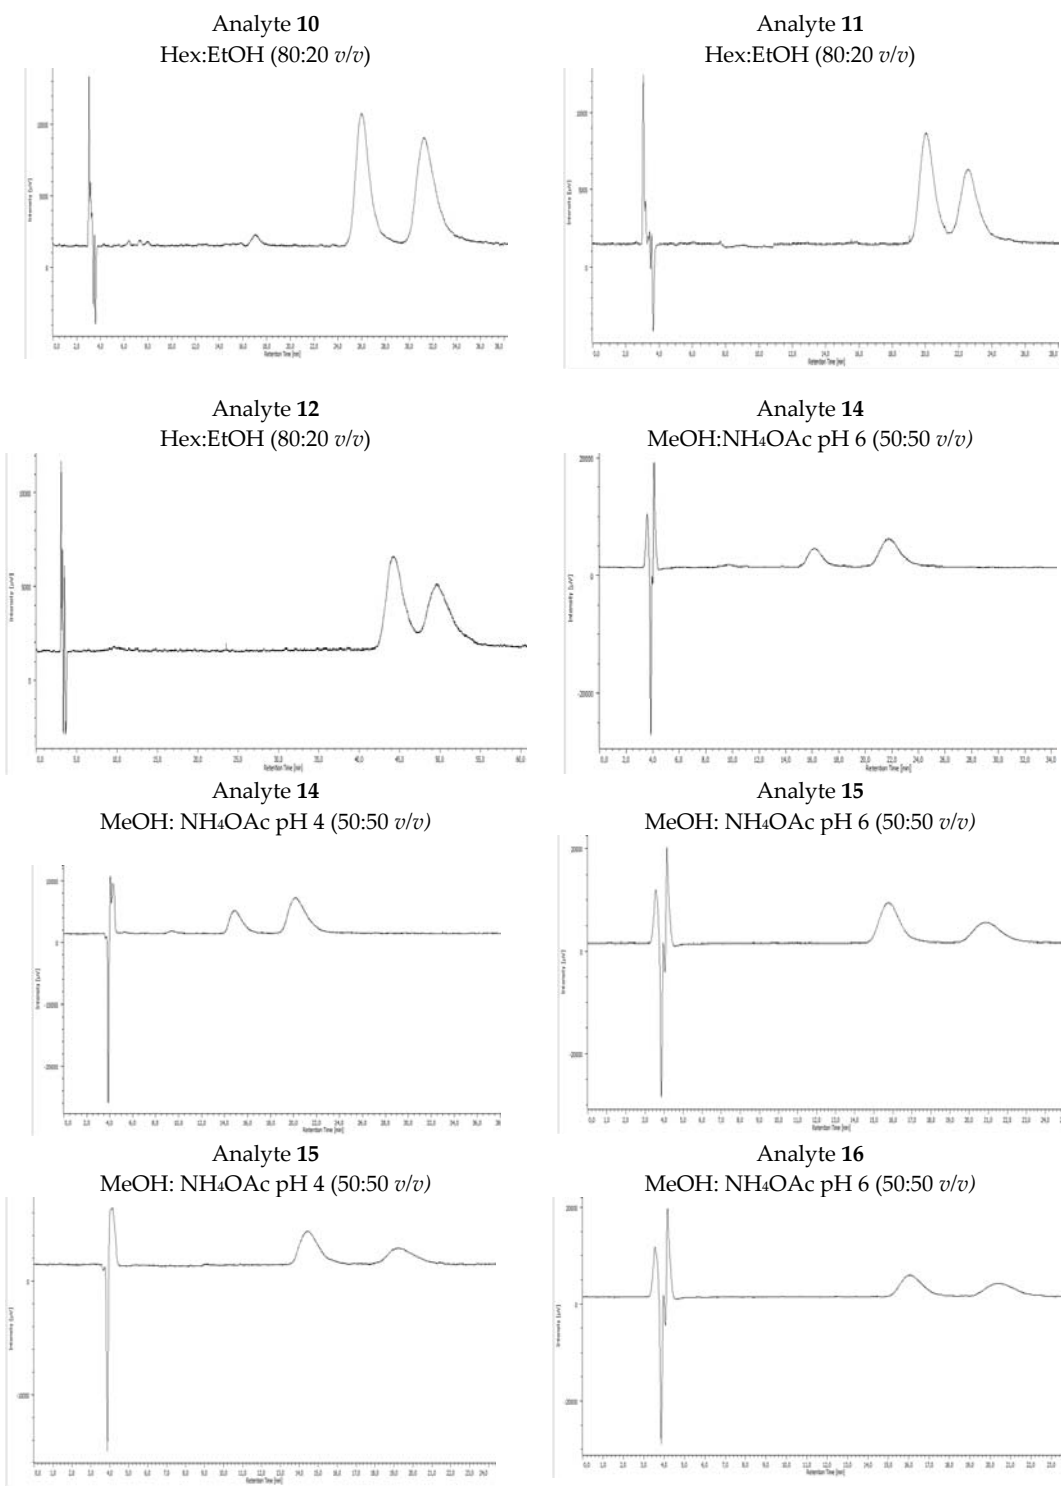

**Figure 10:** Chromatograms for the enantioseparation of analytes 10, 11, 12, 14, 15 and 16 on Chirobiotic V column using different mobile phases. Chromatographic conditions: Flow rate: 0.5 mL/min, UV detection at 254 nm.

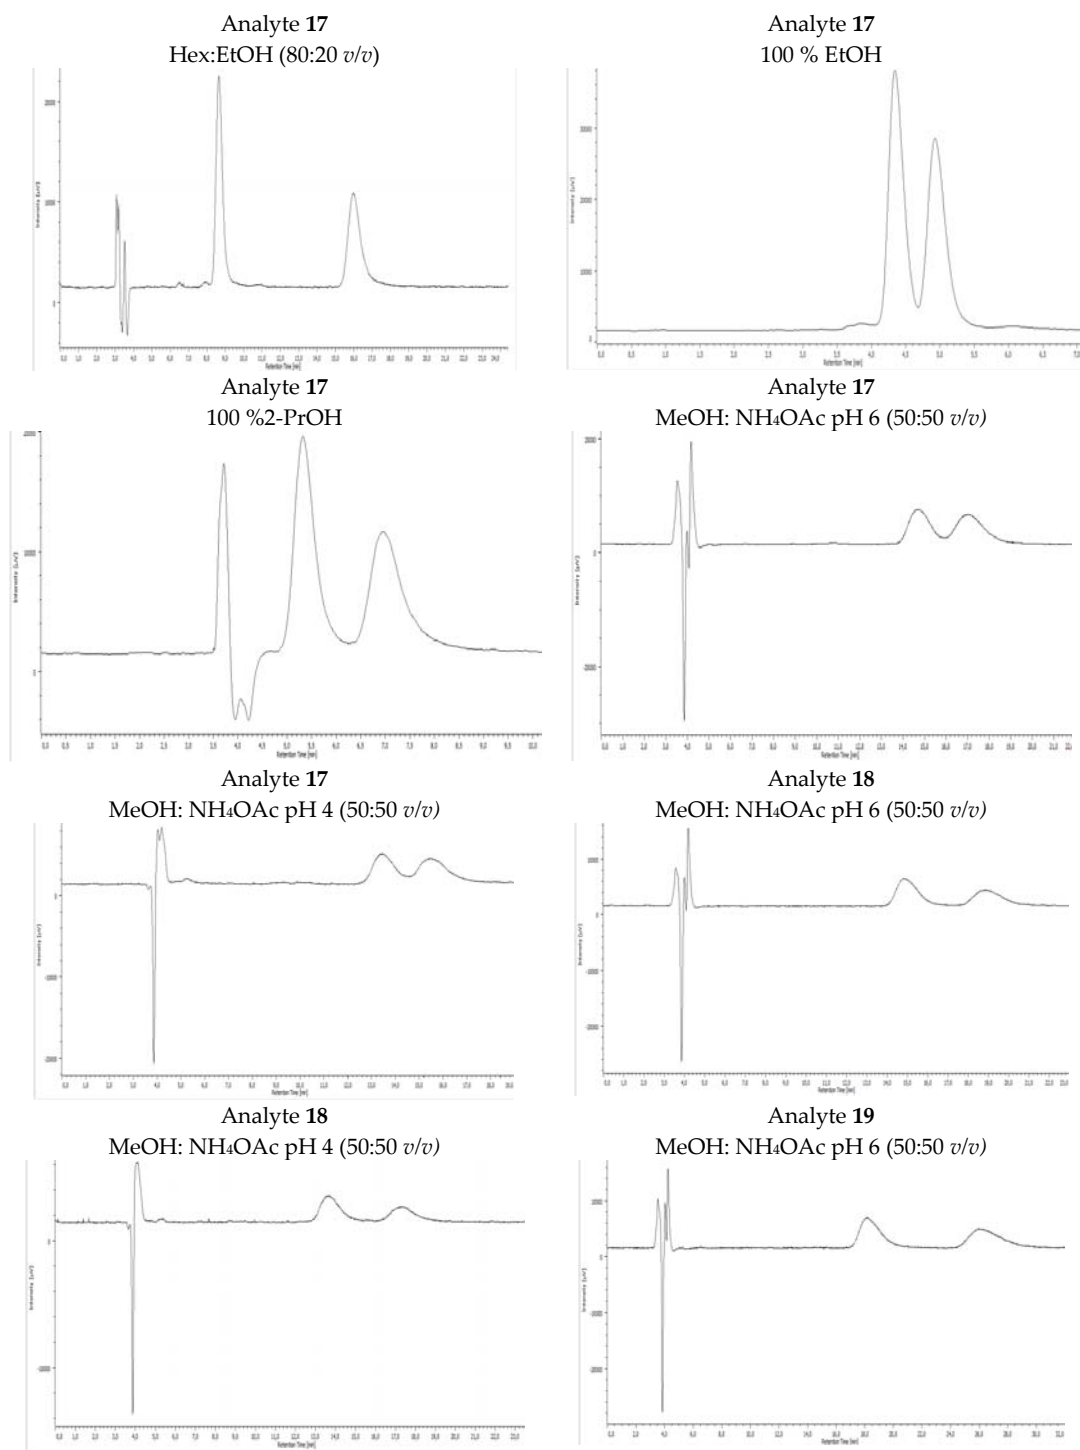

**SFigure 11:** Chromatograms for the enantioseparation of analytes 17-19 on Chirobiotic V column using different mobile phases. Chromatographic conditions: Flow rate: 0.5 mL/min, UV detection at 254 nm.

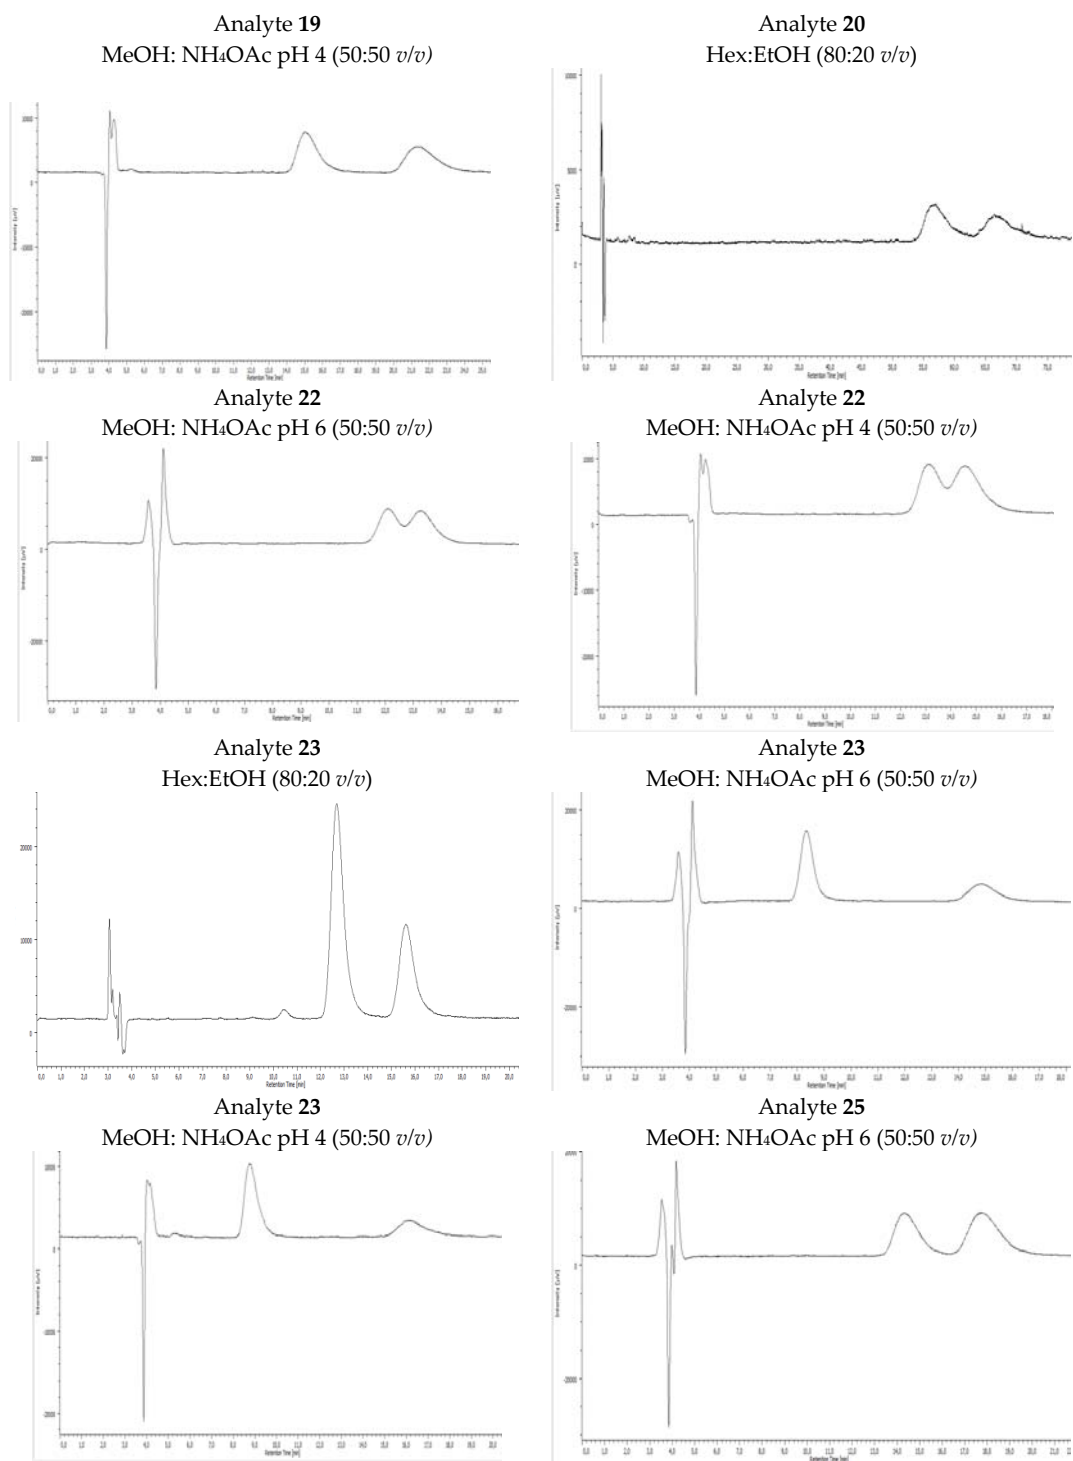

**Figure 12:** Chromatograms for the enantioseparation of analytes 19, 20, 22, 23 and 25 on Chirobiotic V column using different mobile phases. Chromatographic conditions: Flow rate: 0.5 mL/min, UV detection at 254 nm.

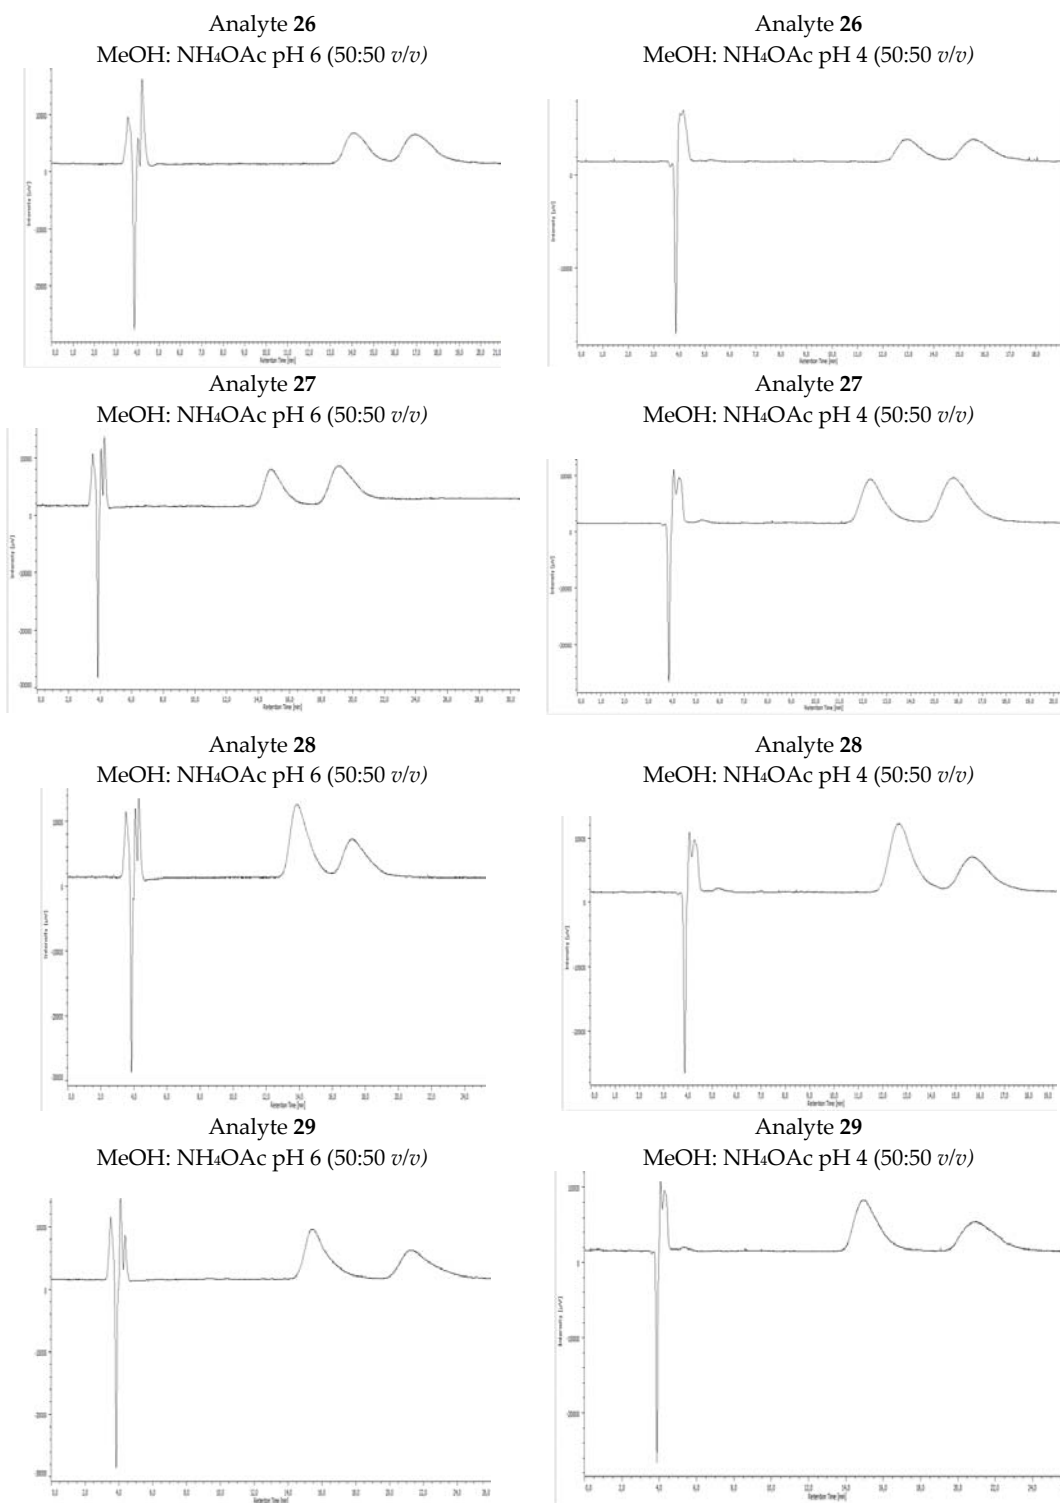

**SFigure 13:** Chromatograms for the enantioseparation of analytes **26-29** on Chirobiotic V column using different mobile phases. Chromatographic conditions: Flow rate: 0.5 mL/min, UV detection at 254 nm.

Analyte 2  
100 % EtOH

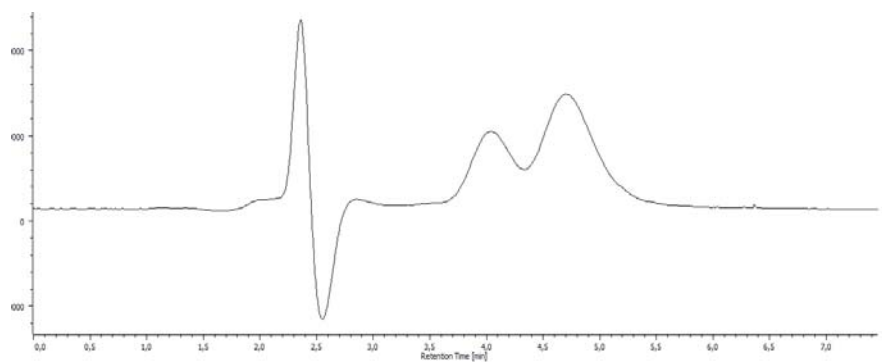

Analyte 17  
Hex:EtOH (70:30 v/v)

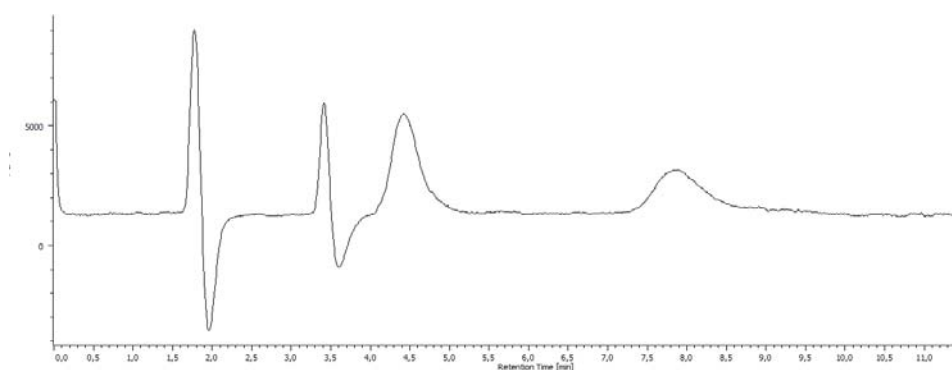

**Figure 14:** Chromatograms for the enantioseparation of analytes **2** and **17** on Chirobiotic TAG column using different mobile phases. Chromatographic conditions: Flow rate: 0.2 mL/min, UV detection at 254 nm.
